# Supplementary material for: Comparative analysis of selected methods for the assessment of antimicrobial and membrane-permeabilizing activity: a case study for lactoferricin derived peptides
Source: Springer Nature journal article supplement (doi:10.1186/1471-2180-8-196), 2008-11-11
Supplement: Additional file 5 [file 1471-2180-8-196-s5.pdf]

**Table 5.** Permeabilizing activity of peptides added at subinhibitory concentrations on *Pseudomonas aeruginosa* 4158-02

| PEPTIDE | MIC ( $\mu\text{g/mL}$ ) <sup>1</sup> | MIC RATIO of novobiocin at the peptide concentration ( $\mu\text{g/mL}$ ) indicated <sup>2</sup> |       |      |      |      |                   | FIC <sup>3</sup> index | NPN uptake <sup>4</sup> |
|---------|---------------------------------------|--------------------------------------------------------------------------------------------------|-------|------|------|------|-------------------|------------------------|-------------------------|
|         |                                       | 0.78                                                                                             | 3.125 | 6.25 | 12.5 | 25   | 50                |                        |                         |
| P2      | 250                                   | < 2                                                                                              | < 2   | < 2  | 2    | 4    | 16                | 0.263                  | 145 $\pm$ 34            |
| P3      | >250                                  | < 2                                                                                              | < 2   | < 2  | < 2  | < 2  | 2                 | > 0.5                  | 20 $\pm$ 5              |
| P8      | >250                                  | < 2                                                                                              | < 2   | < 2  | 2    | 4    | 8                 | 0.225                  | 247 $\pm$ 7             |
| P10     | >250                                  | < 2                                                                                              | < 2   | 2    | 4    | 16   | 16                | 0.113                  | 224 $\pm$ 23            |
| P14     | >250                                  | < 2                                                                                              | < 2   | 4    | 8    | 16   | 32                | 0.113                  | 336 $\pm$ 30            |
| P15     | 250                                   | < 2                                                                                              | < 2   | 2    | 4    | 16   | 64                | 0.163                  | 280 $\pm$ 30            |
| P22     | 31.25                                 | < 2                                                                                              | < 2   | < 2  | 32   | 1024 | n.f. <sup>5</sup> | 0.431                  | 237 $\pm$ 25            |
| P24     | >250                                  | < 2                                                                                              | < 2   | < 2  | < 2  | 8    | 32                | 0.131                  | 272 $\pm$ 37            |
| P28     | >250                                  | < 2                                                                                              | < 2   | < 2  | < 2  | < 2  | < 2               | > 0.5                  | 50 (110)                |
| P36     | 250                                   | < 2                                                                                              | < 2   | < 2  | < 2  | < 2  | 4                 | 0.450                  | 253 $\pm$ 73            |
| P41     | >250                                  | < 2                                                                                              | < 2   | < 2  | < 2  | < 2  | < 2               | > 0.5                  | 35 (105)                |
| P48     | 250                                   | < 2                                                                                              | < 2   | < 2  | 8    | 32   | 256               | 0.131                  | 287 $\pm$ 25            |
| P54     | >250                                  | < 2                                                                                              | < 2   | < 2  | < 2  | < 2  | < 2               | > 0.5                  | 20 (120)                |
| PMBN    | 31.25                                 | 128                                                                                              | 32    | 32   | 32   | n.f. | n.f.              | 0.033                  | 359 $\pm$ 32            |

<sup>1</sup> Minimum inhibitory concentration of the peptides determined by a conventional microbroth-based assay in non-cation adjusted Mueller Hinton medium

<sup>2</sup> Ratio of novobiocin MICs in the absence and in the presence of the peptide. Novobiocin MIC was equal or higher than 512  $\mu\text{g/mL}$  in the absence of peptide

<sup>3</sup> Fractional inhibitory concentration index (see Material and Methods section for details)

<sup>4</sup> Net increment of fluorescence after addition of 1-N-phenyl-naphthylamine and subsequent (10 s, approximately) stabilization. The final peptide concentration was 50  $\mu\text{g/mL}$ . For those peptides that induced a gradual incorporation of the probe, value in parenthesis corresponds to reading after 120 s.

<sup>5</sup> not feasible (peptide inhibits growth by itself at that concentration)
